# Supplementary material for: The Wheat 55K SNP-Based Exploration of Loci for Spikelet Number Per Spike From a Tetraploid Wheat (Triticum Turgidum L.) Recombinant Inbred Line Population Derived From a Chinese Landrace ‘ailanmai’ and a Wild Emmer Accession
Source: Research Square preprint supplement (doi:10.21203/rs.3.rs-126308/v1), 2020-12-16
Supplement: Supplementary file 1 [file 39f3ce4bcaf13fc54cdef8bf.xlsx]

## Sheet: Sheet1
Additional file 1 Environmental information of surveyed agronomic traits
Traits	Environments
SNS	E1	E2	E3	E4	E5	E6
PH	E1	E2	E3	E4	E5
AD	E3
PTN	E1	E2	E3	E4	E5
SL	E1	E2	E3	E4	E5	E6
SEL	E3	E4	E5
KNS	E3	E4	E5	E6
TKW	E3	E4	E5	E6
Note:
SNS: spikelet number per spike; PH: plant height; AD: anthesis date; PTN: productive tiller number; SL: spike length; SEL: spike extension length; KNS: kernel number per spike; TKW: thousand kernel weight
